# Supplementary material for: MLKL polymerization-induced lysosomal membrane permeabilization promotes necroptosis
Source: PubMed Central journal article supplement (PMC10782024; doi:10.1038/s41418-023-01237-7), 2023-11-23

**MLKL polymerization-induced lysosomal membrane  
permeabilization promotes necroptosis**

Supplemental Material – Original Blots

Relevant areas for cropped blots in the main and  
Extended Data figures are shown with red boxes.

# Supplemental Material to Fig. 1d (original blots)

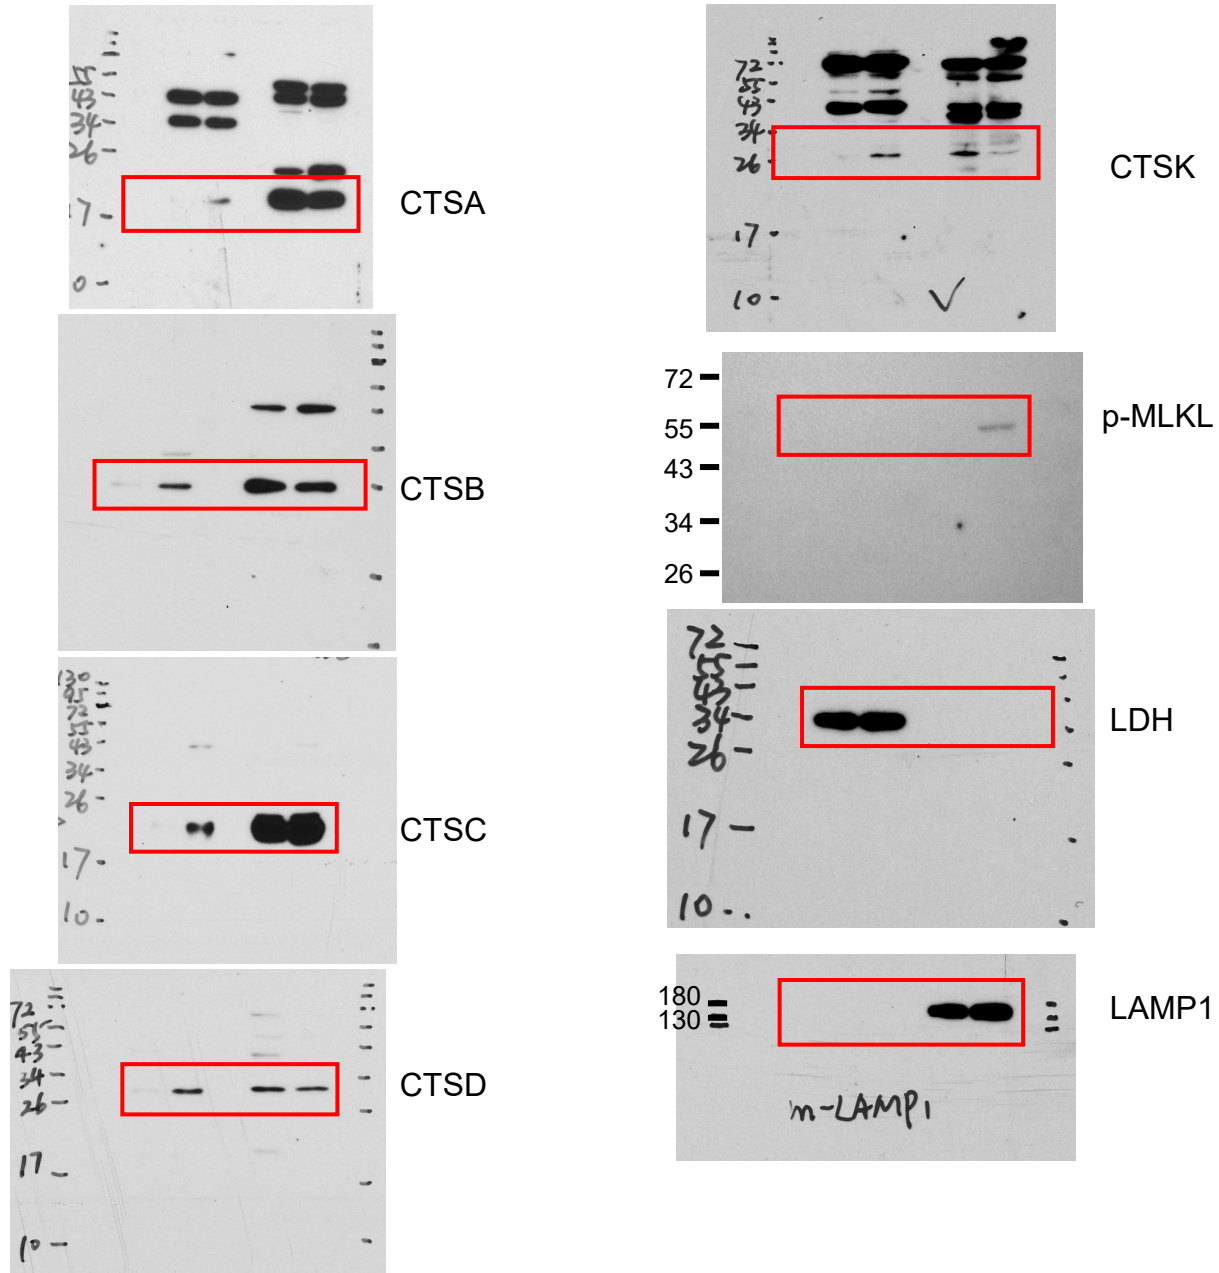

# Supplemental Material to Fig. 2 (original blots)

## Fig. 2b

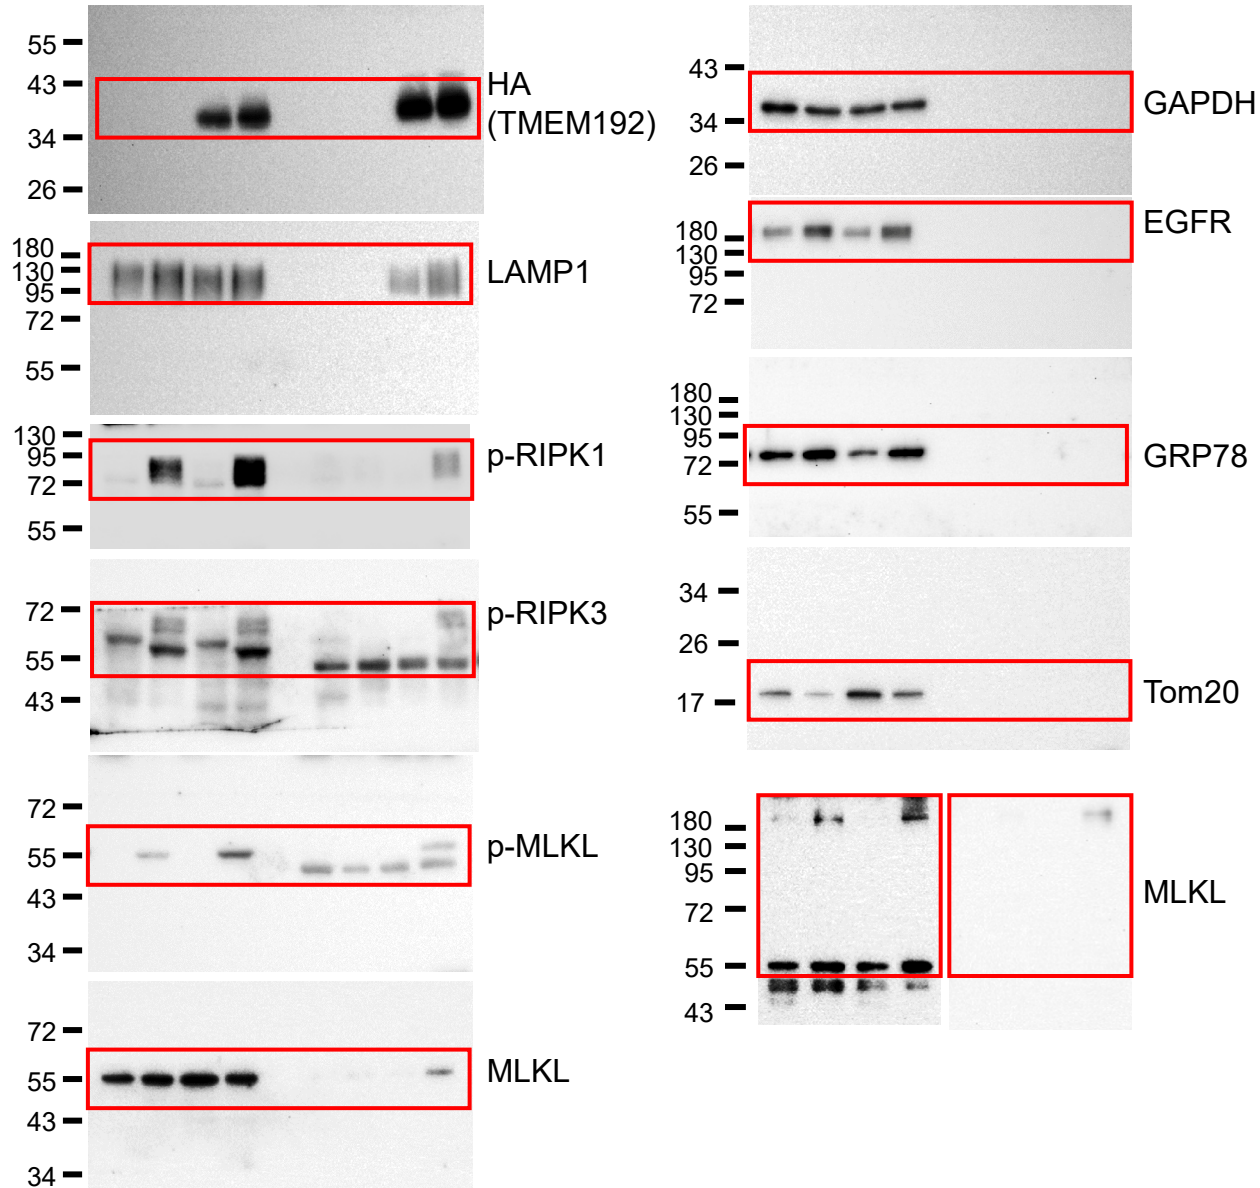

## Fig. 2c

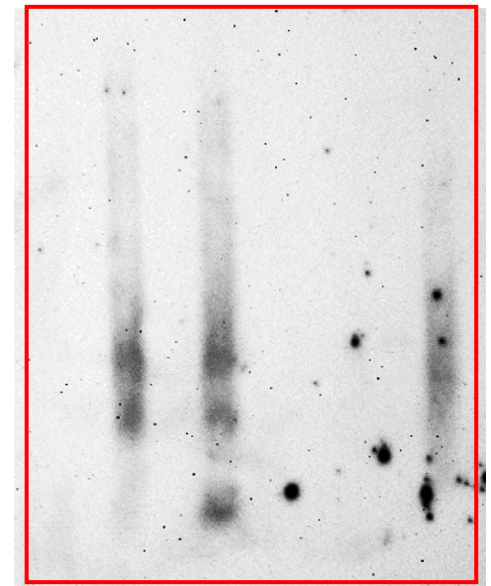

# Supplemental Material to Fig. 3 (original blots)

Fig. 3a

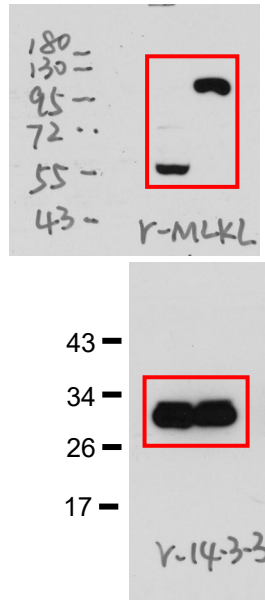

Fig. 3f

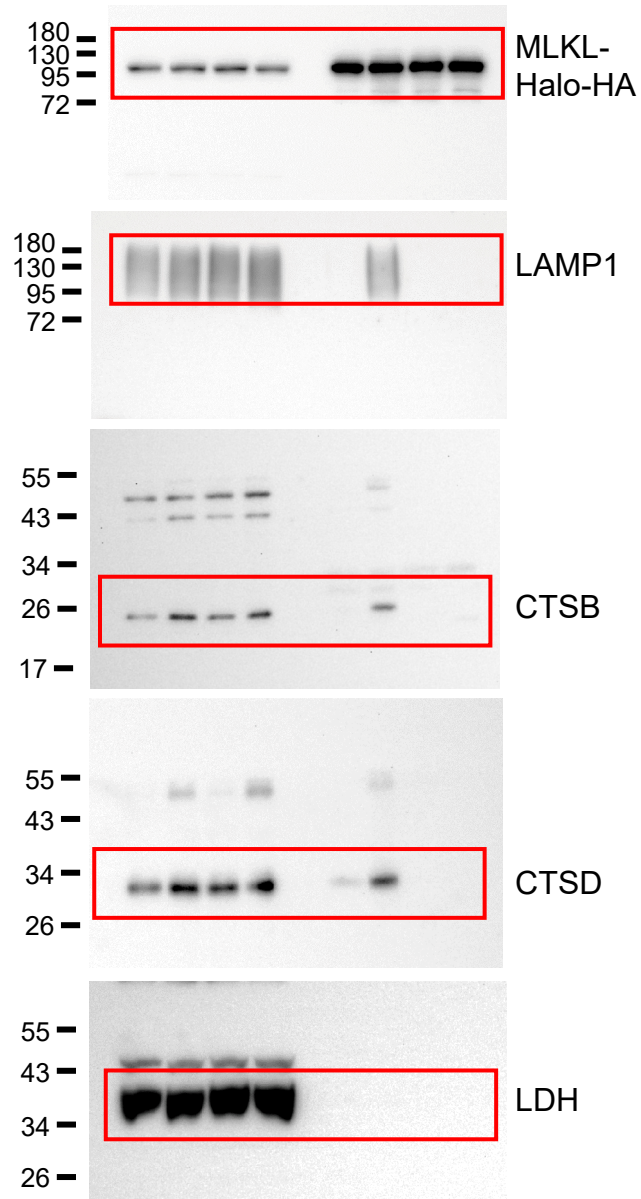

# Supplemental Material to Fig. 4 (original blots)

## Fig.4b

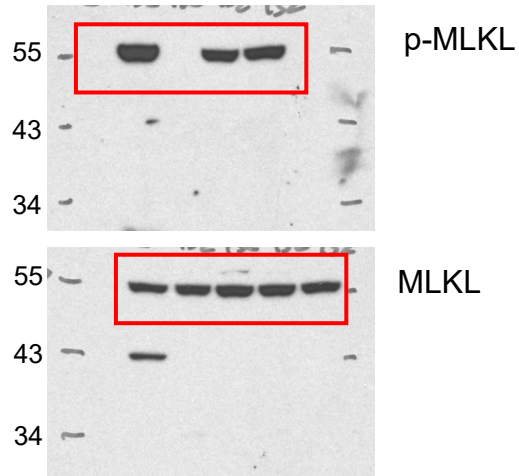

## Fig.4c

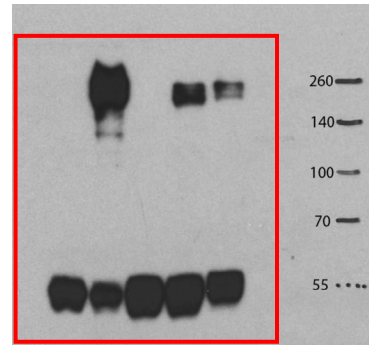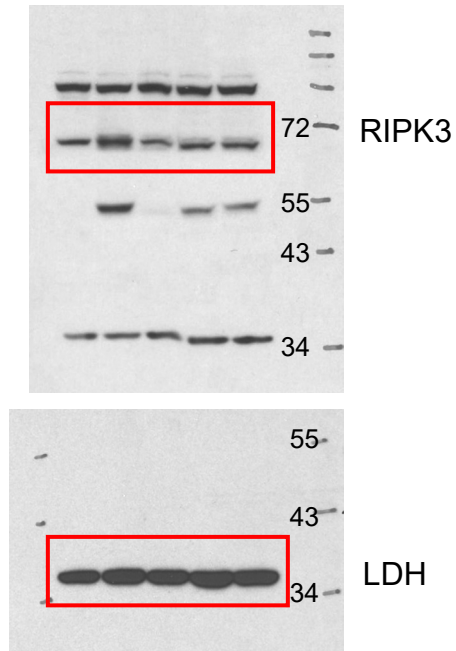

## Fig.4d

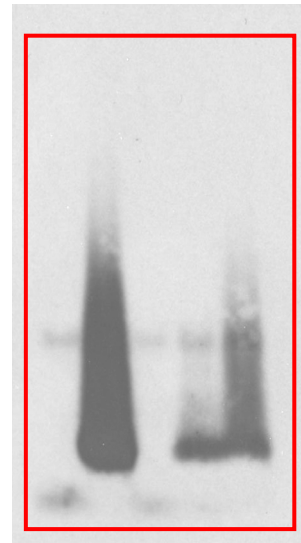

Supplemental Material to Fig. 4 (original blots)

Fig.4e

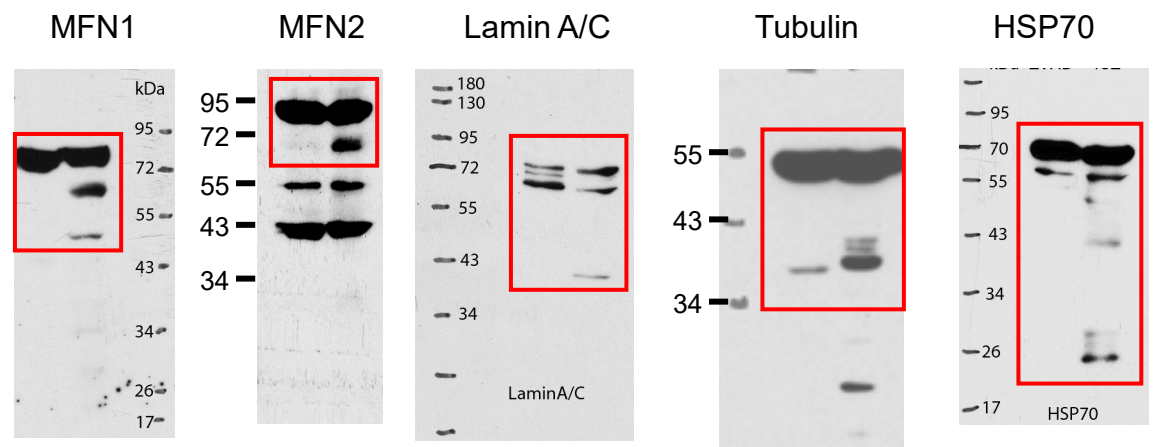

Fig.4f

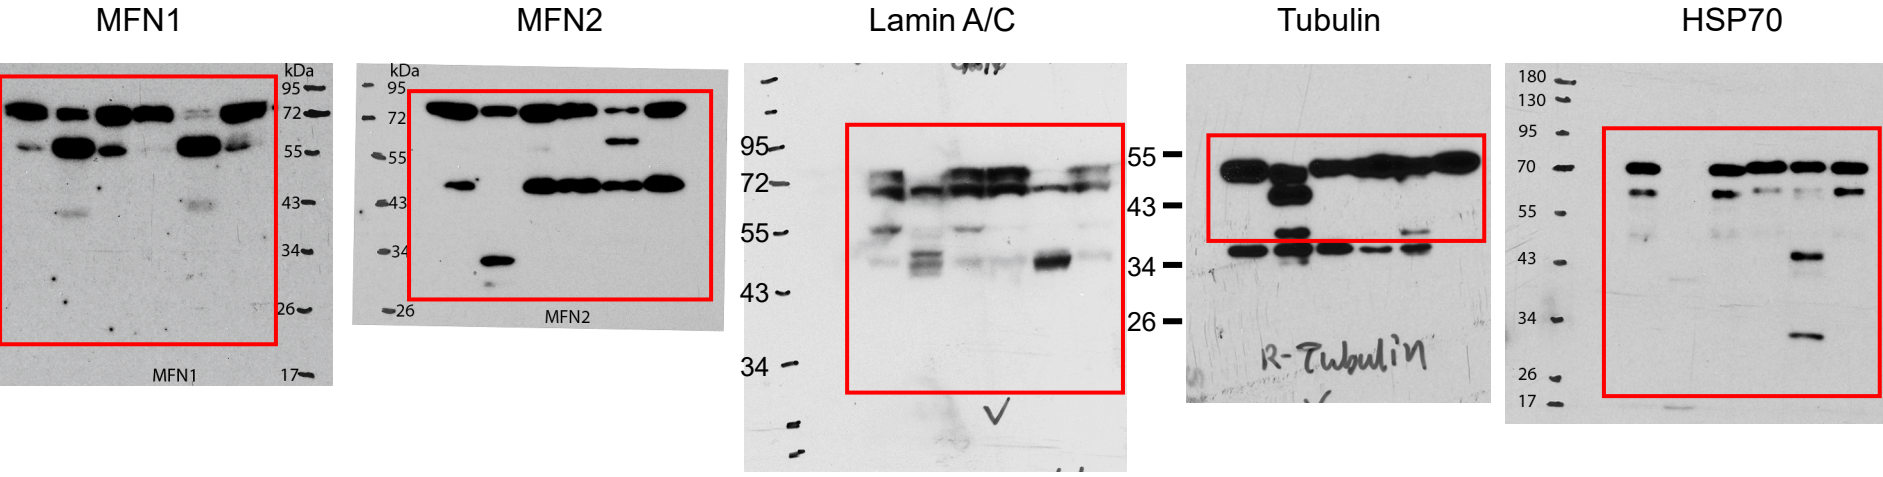

# Supplemental Material to Fig. 5 (original blots)

## Fig.5a

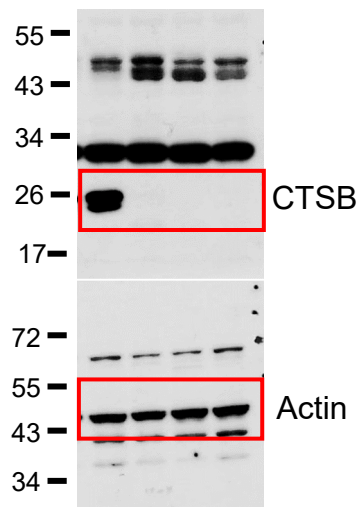

## Fig.5c

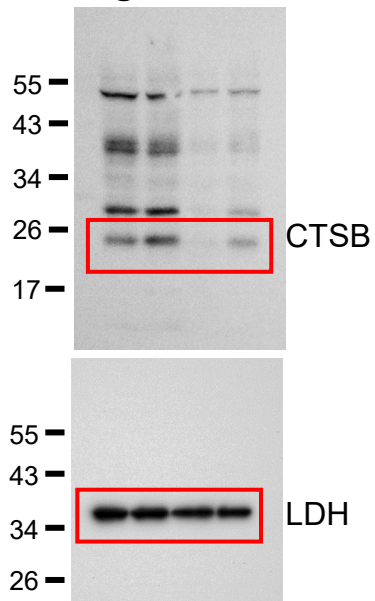

## Fig.5d

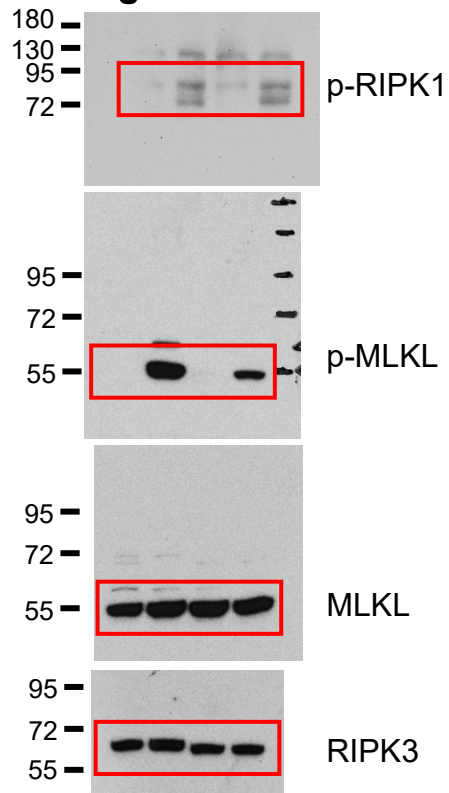

## Fig.5e

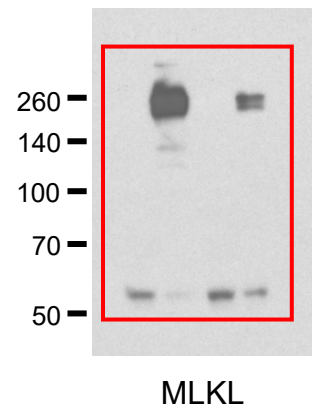

## Fig.5f

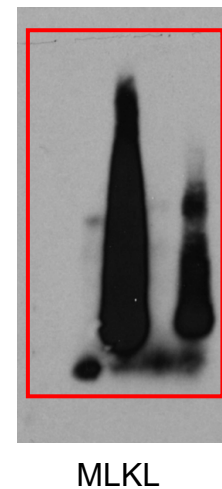

## Fig.5g

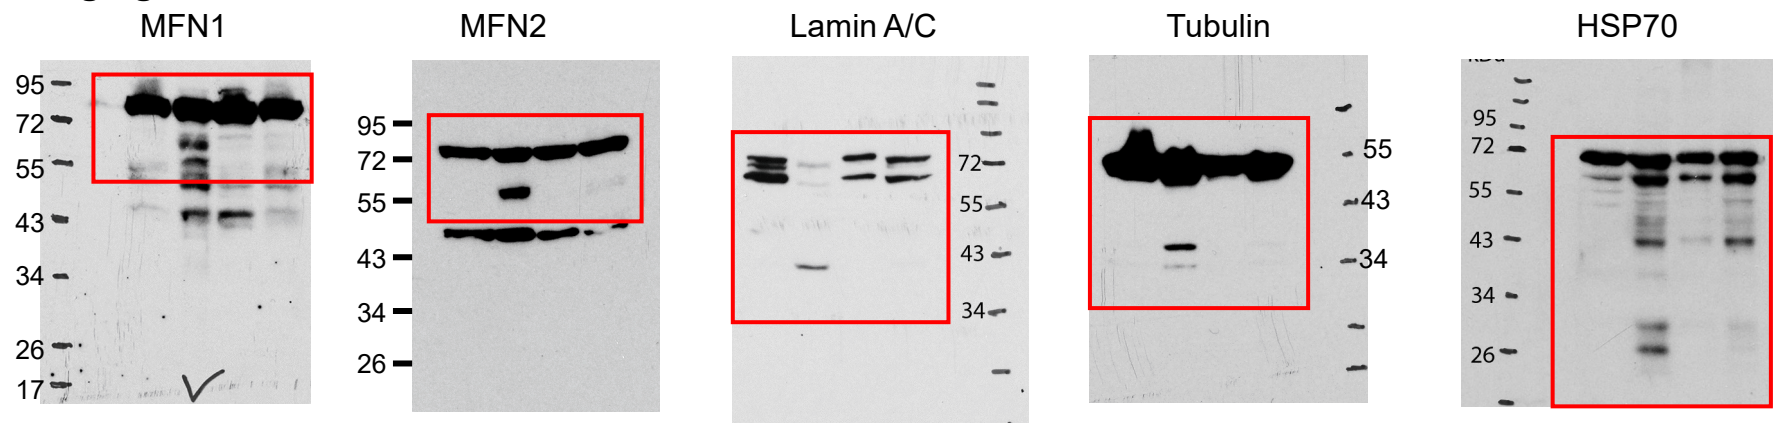

# Supplemental Material to Fig. 6 (original blots)

## Fig.6c

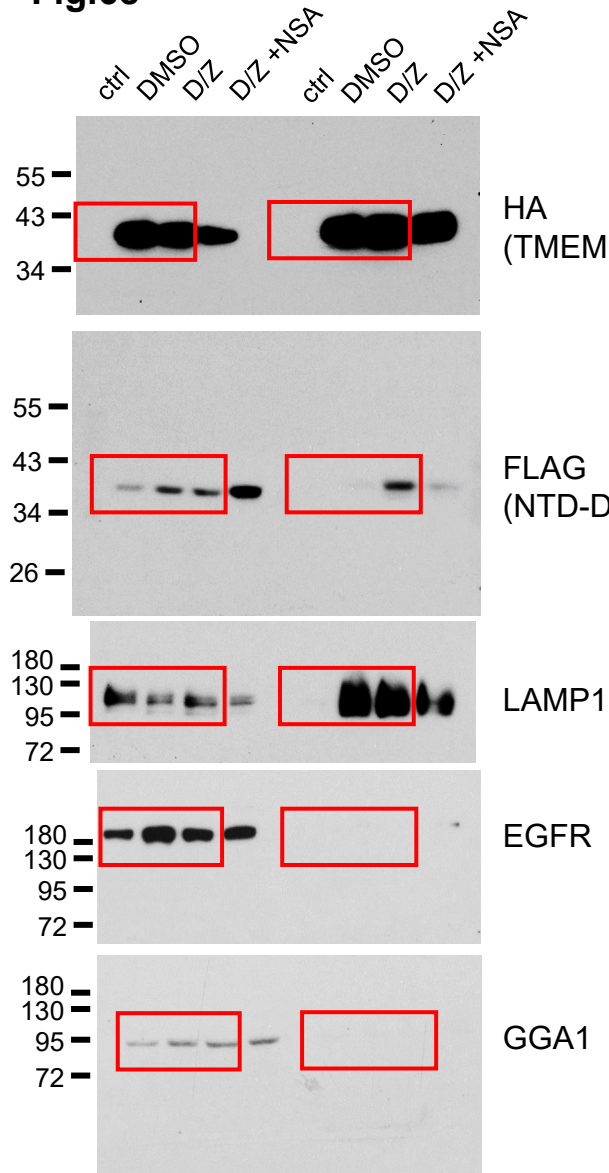

## Fig.6d

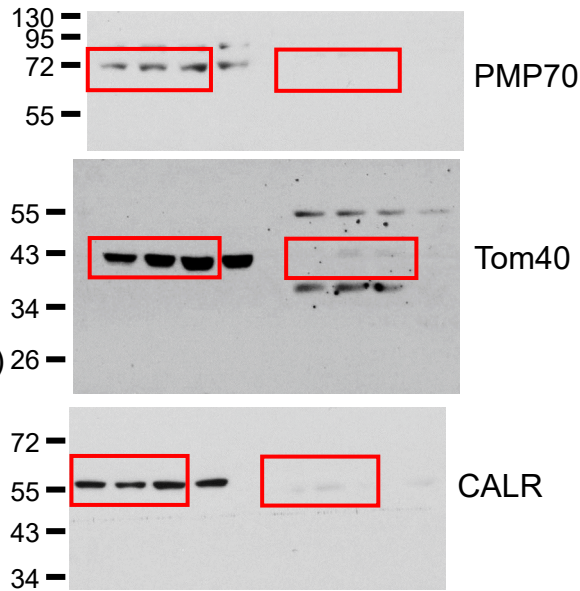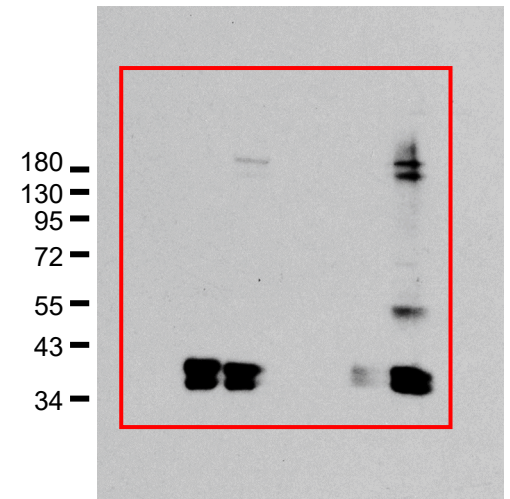

## Fig.6e

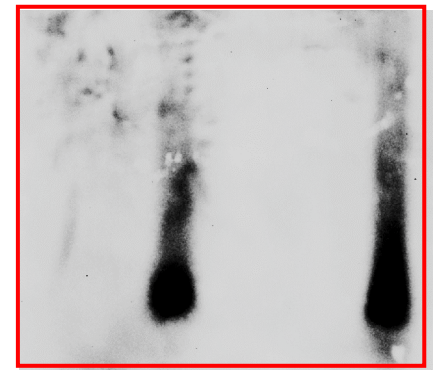



# Supplemental Material to Fig. 7 (original blots)

## Fig.7d

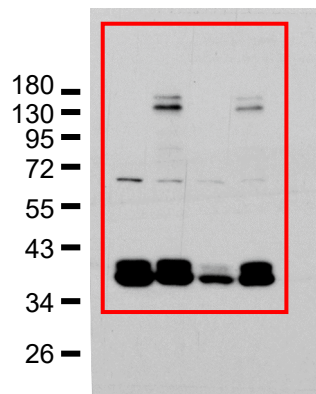

## Fig.7e

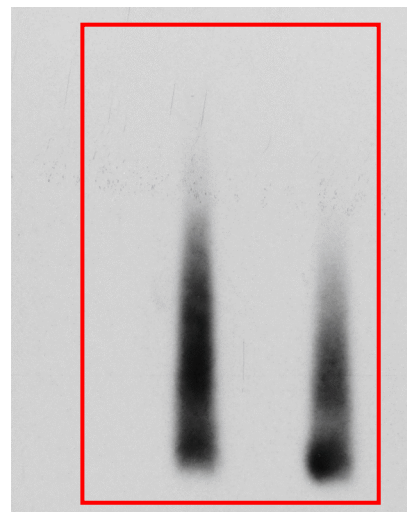

## Fig.7f

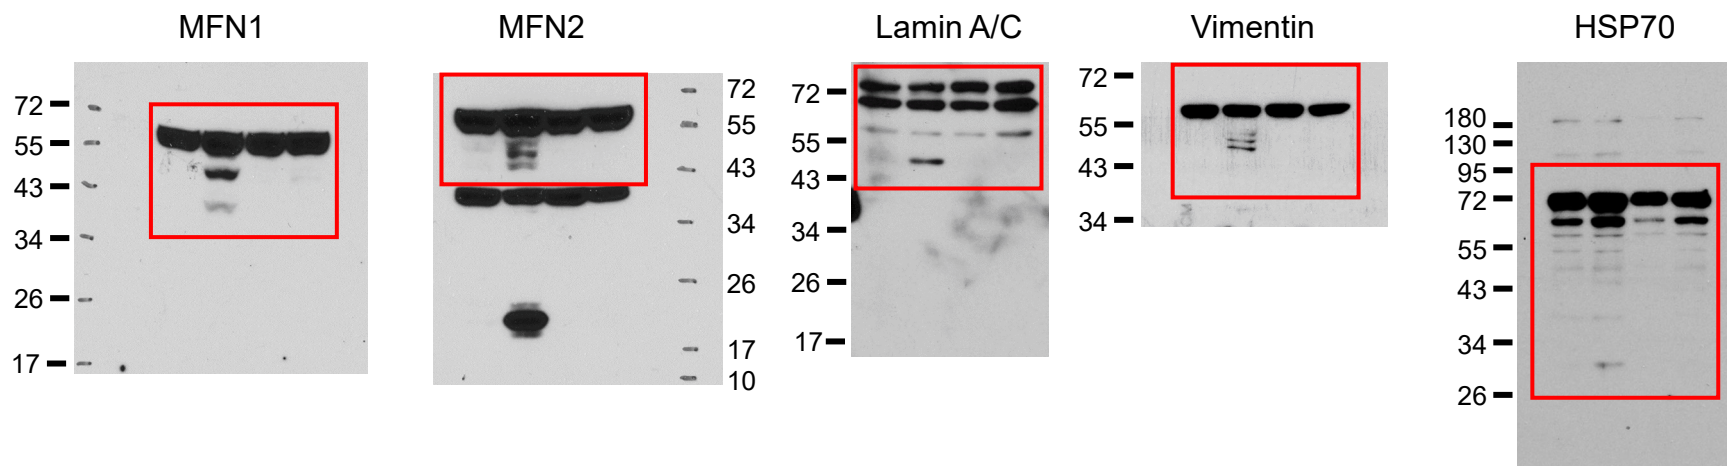

# Supplemental Material to Supplemental Fig.1 (original blots) Fig.S1c

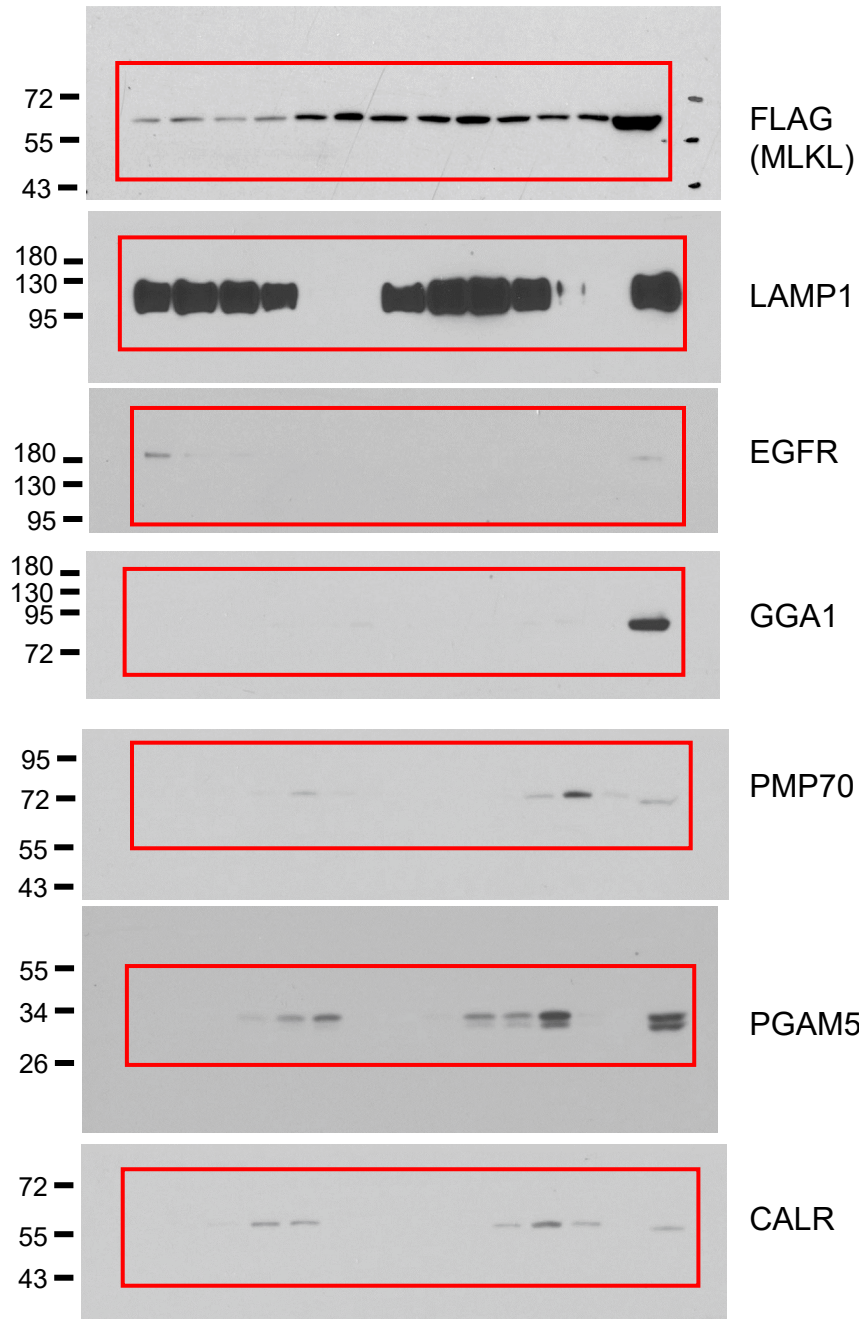

## Fig.S1d

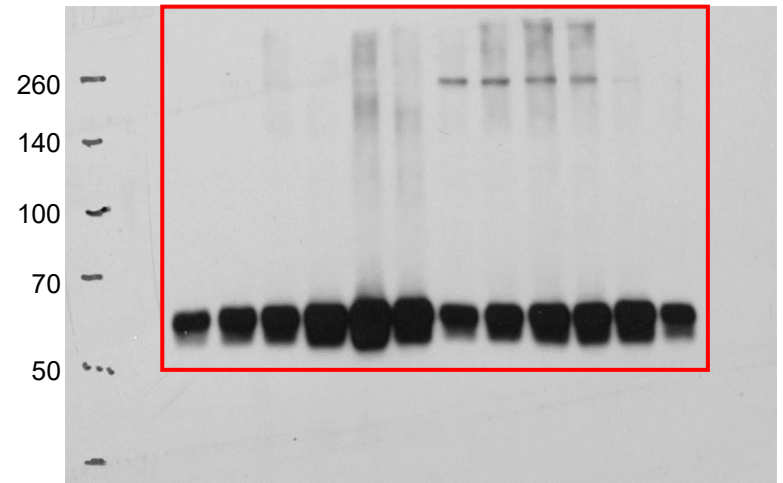

## Fig.S1e

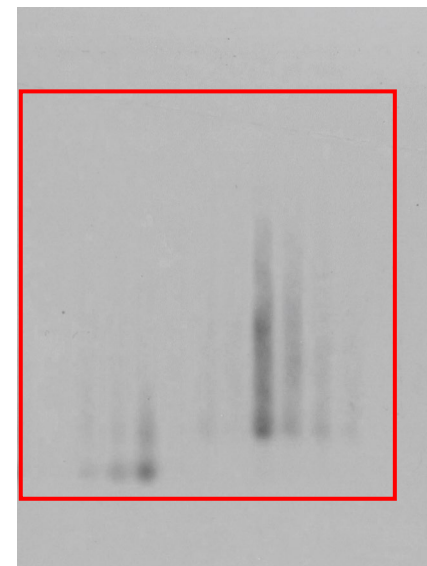

## Supplemental Material to Supplemental Fig.3b (original blots)

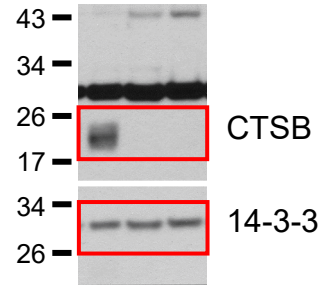

# Supplemental Material to Supplemental Fig. 4 (original blots)

## Fig.S4b

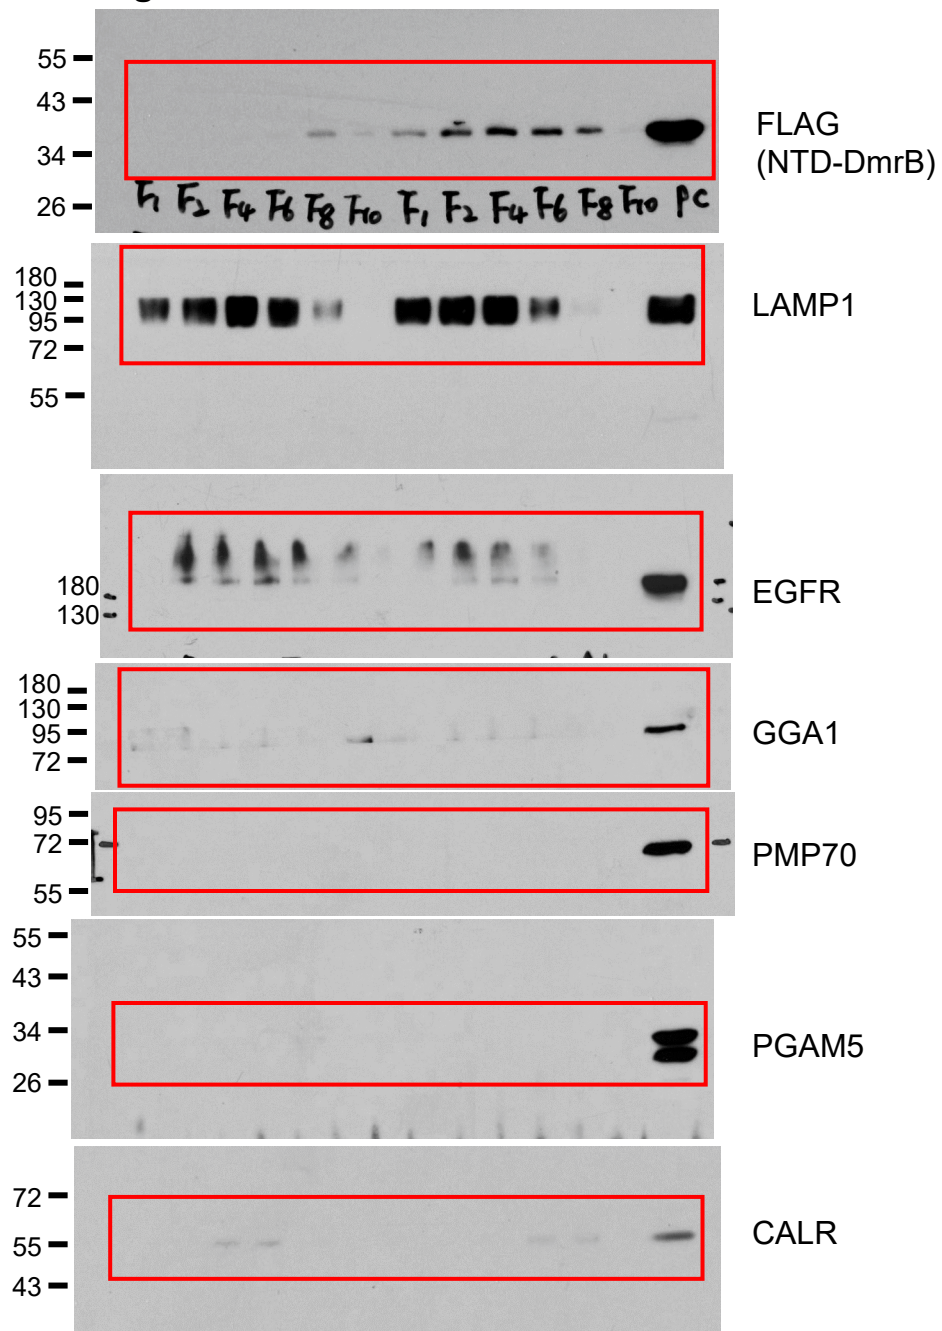

## Fig.S4c

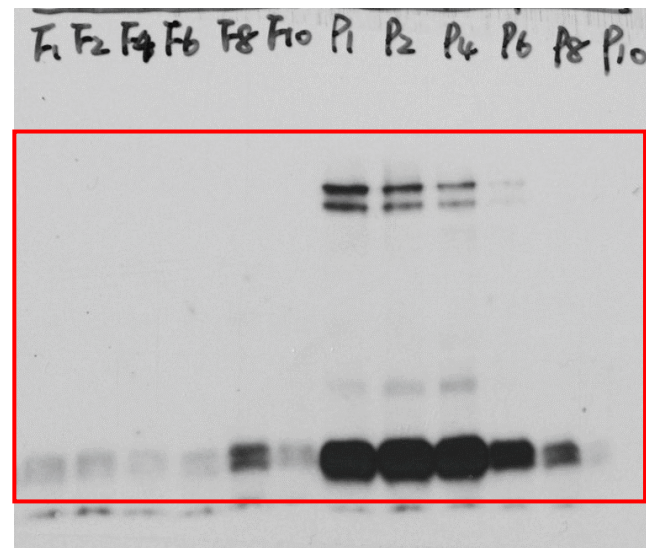

## Fig.S4d

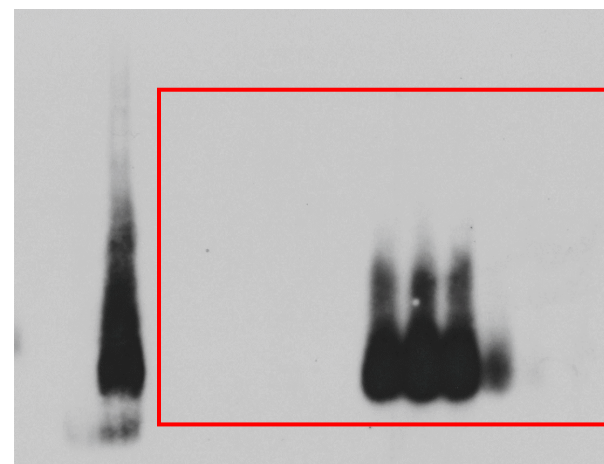

Supplement: 41418_2023_1237_MOESM10_ESM.pdf [file 41418_2023_1237_MOESM10_ESM.pdf]
